# Supplementary material for: Packing similarity in polymorphs of sulfathiazole
Source: Royal Society of Chemistry journal article supplement (doi:10.1039/b807898j), 2008-01-01
Supplement: b807898j.pdf [file b807898j.pdf]

## Supplementary Information

### 1. Molecular geometry

**Table S1.** XPac comparison of the *molecular* geometries present in forms **I-V** of sulfathiazole at 150 K (see Table 1). An average deviation  $\delta_{\text{mol}}$  (in °) in corresponding internal coordinates (angles) is generated from 16 non-hydrogen positions. The very low deviations occurring in the group of **III-V** (underlined entries), indicate a high degree of similarity.

| Form<br>↓  | →<br>Mol. →<br>↓ | <b>I</b><br>1 | <b>I</b><br>2 | <b>II</b><br>1 | <b>II</b><br>2 | <b>III</b><br>1 | <b>III</b><br>2 | <b>IV</b>  | <b>V</b>   |
|------------|------------------|---------------|---------------|----------------|----------------|-----------------|-----------------|------------|------------|
| <b>I</b>   | 1                |               | 2.0           | 5.0            | 3.6            | 4.6             | 4.0             | 4.4        | 4.2        |
| <b>I</b>   | 2                |               |               | 5.9            | 3.9            | 4.4             | 3.9             | 4.1        | 4.0        |
| <b>II</b>  | 1                |               |               |                | 2.9            | 3.9             | 3.6             | 3.7        | 3.7        |
| <b>II</b>  | 2                |               |               |                |                | 2.2             | 1.9             | 2.0        | 1.9        |
| <b>III</b> | 1                |               |               |                |                |                 | <u>0.9</u>      | <u>0.5</u> | <u>0.6</u> |
| <b>III</b> | 2                |               |               |                |                |                 |                 | <u>0.5</u> | <u>0.4</u> |
| <b>IV</b>  |                  |               |               |                |                |                 |                 |            | <u>0.3</u> |
| <b>V</b>   |                  |               |               |                |                |                 |                 |            |            |

### 2. Crystal packing

**Table S2.** The XPac dissimilarity index  $\Delta$  (°) was computed according to Eq. 4 of ref. 5 on the basis of 16 non-hydrogen positions as corresponding points. Table entries are coloured according to which SC (Fig. 6) they refer to, **dimer** (Fig. 5), **monolayer** (Fig. 1a), **bilayer A** (Fig. 1b) or **bilayer B** (Fig. 1d). Note that the  $Z' = 2$  form **II** has two independent dimers, while the  $Z' = 2$  polymorph **III** has just one. The monolayer and bilayer SCs of **III-V** exhibit a very high degree of similarity ( $\Delta < 1^\circ$ ) with corresponding low  $\delta_{\text{mol}}$  values between  $0.3^\circ$  and  $0.6^\circ$  (Table S1).  $\Delta$  results from packing differences in addition to any conformational differences ( $\delta_{\text{mol}}$ ).

Using an analogous procedure, the *internal* dissimilarity index  $\Delta_{\text{int}} = 1.3^\circ$  was computed for **III** as a measure of the imperfectness of the non-crystallographic symmetry elements present in the monolayer SC (see Figs. 1a, f). The corresponding  $\delta_{\text{mol}}$  value in Table S1 is  $0.9^\circ$ .

| Form<br>↓  | →<br>Mol.<br>↓ | <b>III</b> | <b>IV</b>  | <b>V</b>   |
|------------|----------------|------------|------------|------------|
| <b>II</b>  | 1              | 4.3        | 4.5        | 4.1        |
| <b>II</b>  | 2              | 2.6        | 2.5        | 2.3        |
| <b>III</b> |                |            | <u>0.8</u> | <u>0.8</u> |
| <b>IV</b>  |                |            |            | <u>0.6</u> |
